# Supplementary material for: Modeling erythrocyte electrodeformation in response to amplitude modulated electric waveforms
Source: PubMed Central journal article supplement (PMC6033869; doi:10.1038/s41598-018-28503-w), 2018-07-05
Supplement: 41598_2018_28503_MOESM2_ESM.pdf [file 41598_2018_28503_MOESM2_ESM.pdf]

# **Modeling erythrocyte electrodeformation in response to amplitude modulated electric waveforms**

**Yuhao Qiang<sup>1</sup>, Jia Liu<sup>1</sup>, Fan Yang<sup>2</sup>, Darryl Dieujuste<sup>3</sup> and E Du<sup>1,\*</sup>**

<sup>1</sup>Department of Ocean and Mechanical Engineering, Florida Atlantic University, Boca Raton, FL 33431, USA.

<sup>2</sup>School of Mechanical Engineering, Nanjing University of Science and Technology, Nanjing, 210094, CHN.

<sup>3</sup>Department of Electrical Engineering, Florida Atlantic University, Boca Raton, FL 33431, USA.

\* Correspondence: [edu@fau.edu](mailto:edu@fau.edu)

**Supplementary figures**

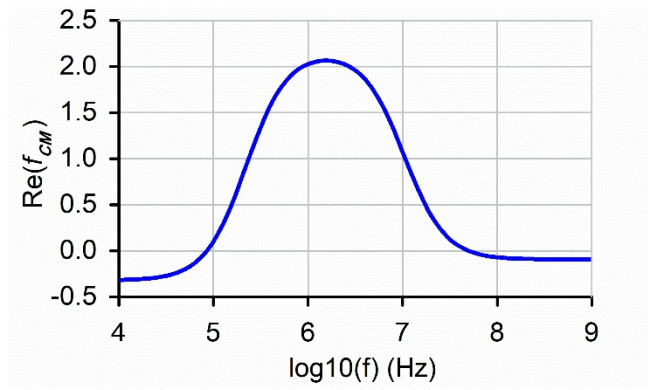

**Figure S1.** Profile of  $\text{Re}(f_{CM})$  of a healthy human red blood cell determined based on a single-shell ellipsoidal model.

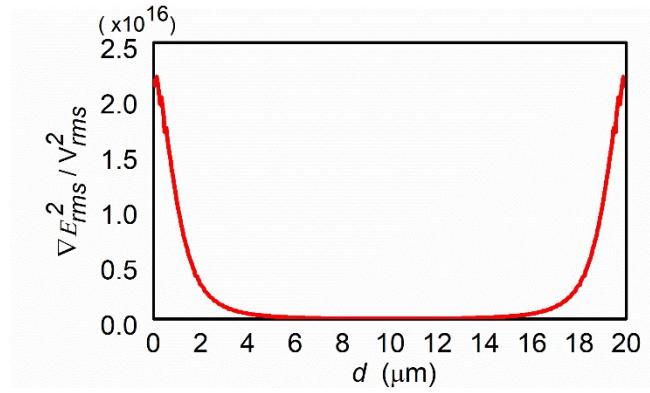

**Figure S2.** Value of  $\nabla^2 E_{rms} / V_{rms}^2$  measured as a function of distance,  $d$  between the center of cell and the edges of the electrode ( $d = 0 \mu\text{m}$  and  $d = 20 \mu\text{m}$ ) from COMSOL Multiphysics simulation.
